# Supplementary material for: Generation and functional assessment of 3D multicellular spheroids in droplet based microfluidics platform
Source: Royal Society of Chemistry journal article supplement (doi:10.1039/c5lc01139f), 2015-12-14
Supplement: c5lc01139f1.pdf [file c5lc01139f1.pdf]

Supplementary Figures:

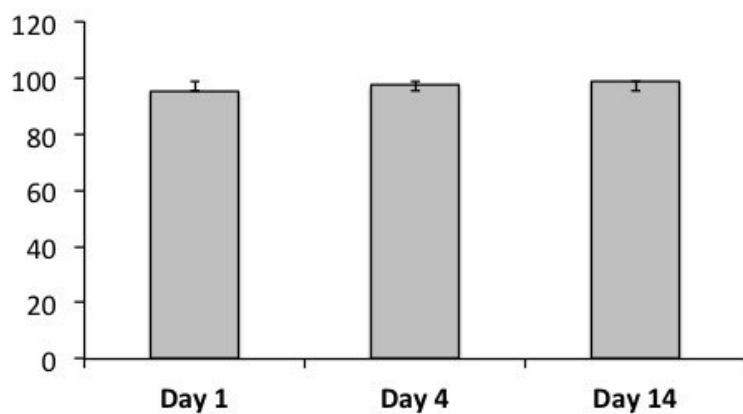

Fig S1: Viability of MCF-7S spheroids in Microfluidic chip over a 14 day time period  
The 3D spheroids were housed in the microfluidic device for 14 days with continuous media perfusion and the cell viability was checked at Day1, 4 and 14 using live/dead assay.

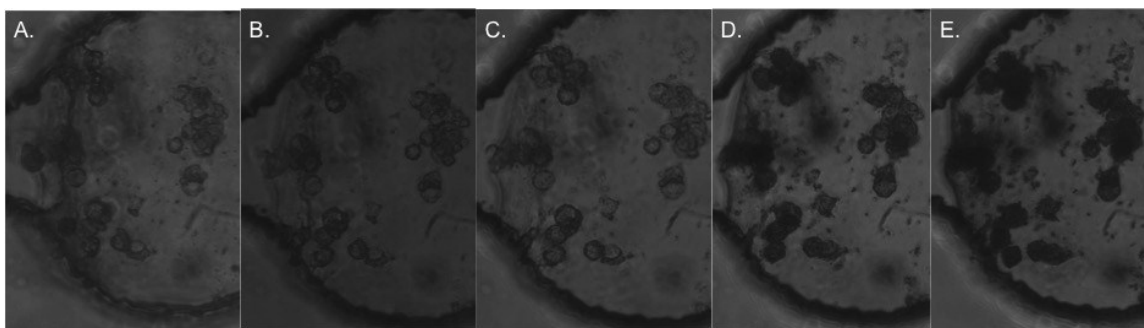

Fig S2: Time-lapse images visualizing proliferation of MCF-7S cells in spheroids over a 14 day period. (A) Day1. (B) Day 4. (C) Day 7. (D) Day 10. (E) Day 14.
